# Supplementary material for: Improvement of variant reclassification in genetic neurodevelopmental conditions
Source: PubMed Central journal article supplement (PMC11613566; doi:10.1016/j.gimo.2024.101845), 2024-04-09

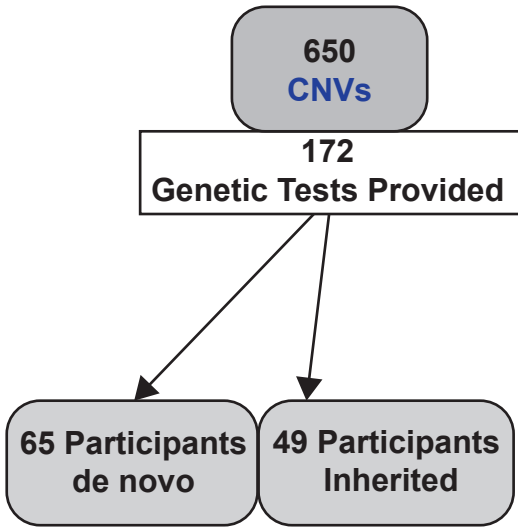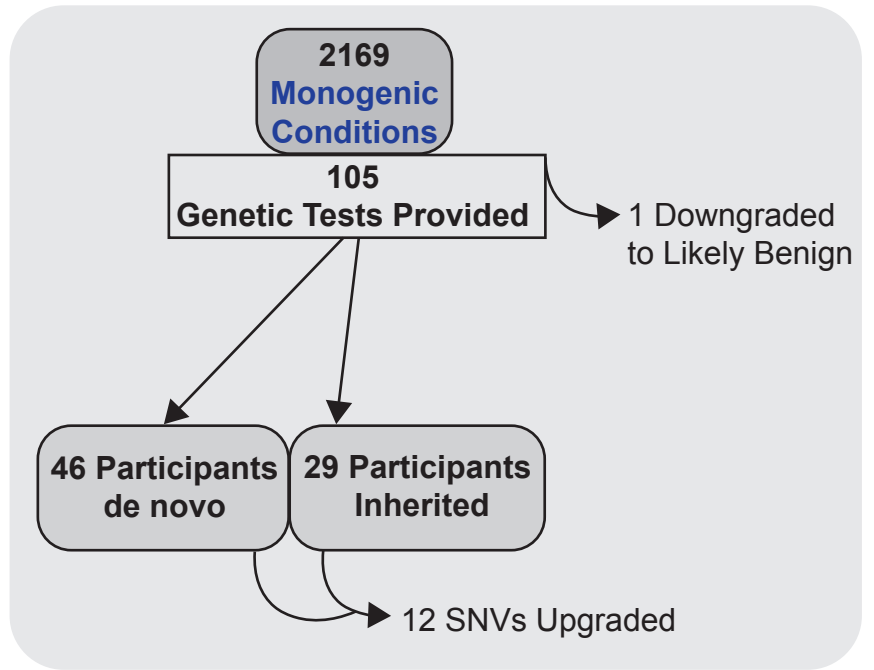

Supplement: mmc1.pdf [file mmc1.pdf]
